# Supplementary material for: The Peptide TAT-I24 with Antiviral Activity against DNA Viruses Binds Double-Stranded DNA with High Affinity
Source: MDPI journal article supplement (doi:10.3390/biologics1010003), 2021-06-10
Supplement: s1 [file s1]

## Supplementary Materials

# The Peptide TAT-I24 with Antiviral Activity against DNA Viruses Binds Double-Stranded DNA with High Affinity

Hanna Harant <sup>1,\*</sup>, Siegfried Höfner <sup>2,3</sup>, Franz Kricek <sup>4</sup>, Christine Ruf <sup>4</sup>, Zsolt Ruzsics <sup>5,6,7</sup>, Hartmut Hengel <sup>5,6,7</sup> and Ivan J.D. Lindley <sup>1</sup>

<sup>1</sup> Pivaris BioScience GmbH, 1030 Vienna, Austria; ivanlindley@gmail.com

<sup>2</sup> VSC Research Center, TU Wien, 1040 Vienna, Austria; siegfried.hoefner@tuwien.ac.at

<sup>3</sup> Department of Physics, Michigan Technological University, Houghton, MI 49931, USA

<sup>4</sup> NBS-C BioScience & Consulting GmbH, 1230 Vienna, Austria; franz.kricek@nbs-c.at (F.K.); christine.ruf@nbs-c.at (C.R.)

<sup>5</sup> Institute of Virology, Medical Center—University of Freiburg, 79104 Freiburg, Germany; zsolt.ruzsics@uniklinik-freiburg.de (Z.R.); hartmut.hengel@uniklinik-freiburg.de (H.H.)

<sup>6</sup> Faculty of Medicine, University of Freiburg, 79104 Freiburg, Germany

<sup>7</sup> German Consulting Laboratory for HSV and VZV, Medical Center—University of Freiburg, 79104 Freiburg, Germany

\* Correspondence: hanna.harant@pivaris-bioscience.at

**Citation:** Harant, H.; Höfner, S.; Kricek, F.; Ruf, C.; Ruzsics, Z.; Hengel, H.; Lindley, I.J.D. The Peptide TAT-I24 with Antiviral Activity against DNA Viruses Binds Double-Stranded DNA with High Affinity. *Biologics* **2021**, *1*, 41–60. <https://doi.org/10.3390/biologics1010003>

Academic Editor: Kai Hilpert

Received: 24 May 2021

Accepted: 7 June 2021

Published: 10 June 2021

**Publisher's Note:** MDPI stays neutral with regard to jurisdictional claims in published maps and institutional affiliations.

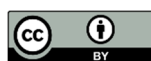

**Copyright:** © 2021 by the authors. Licensee MDPI, Basel, Switzerland. This article is an open access article distributed under the terms and conditions of the Creative Commons Attribution (CC BY) license (<http://creativecommons.org/licenses/by/4.0/>).

**Figure S1**

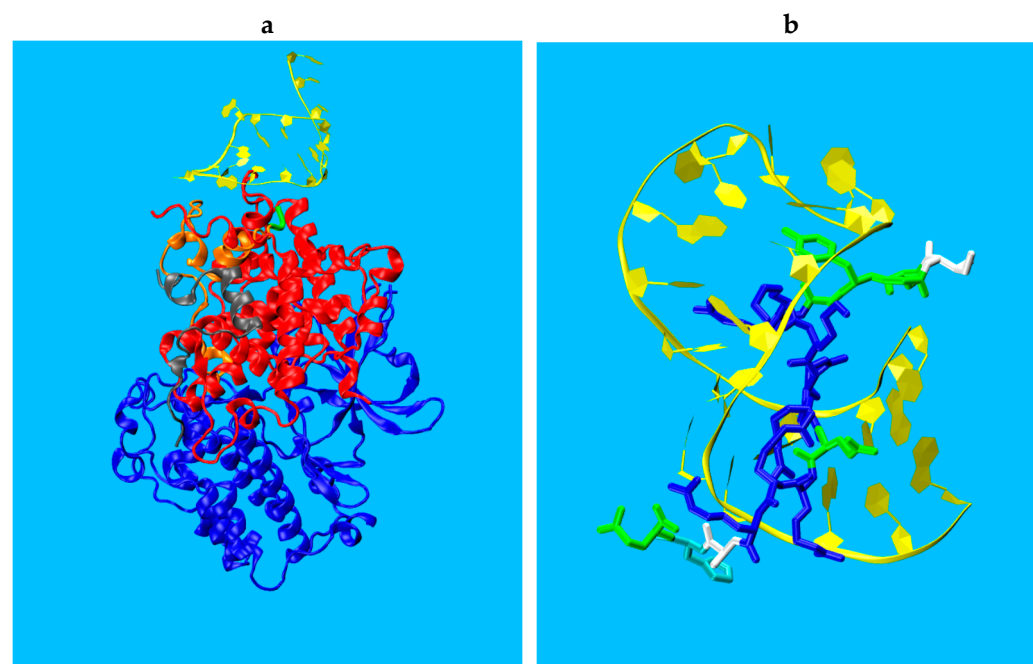

**Figure S1.** Structural information of the TAT protein as template for affinity studies. (a), the peptide sequence GRKKRRQRRR is found in the TAT-protein of HIV-1 (1). A crystal structure (pdb code 6CYT) identifies its location in close proximity to the RNA stem loop (glycine (G) indicated in green, the RNA in yellow). Backbone interactions between R/K and the phosphate groups of the RNA are likely (2). (b) Close-up of the complex as revealed by the NMR structure (pdb code 6MCE) with again pronounced R/K-backbone interactions (3). This structure may serve as template for systematic affinity studies of DNA/peptide samples.

**Figure S2**

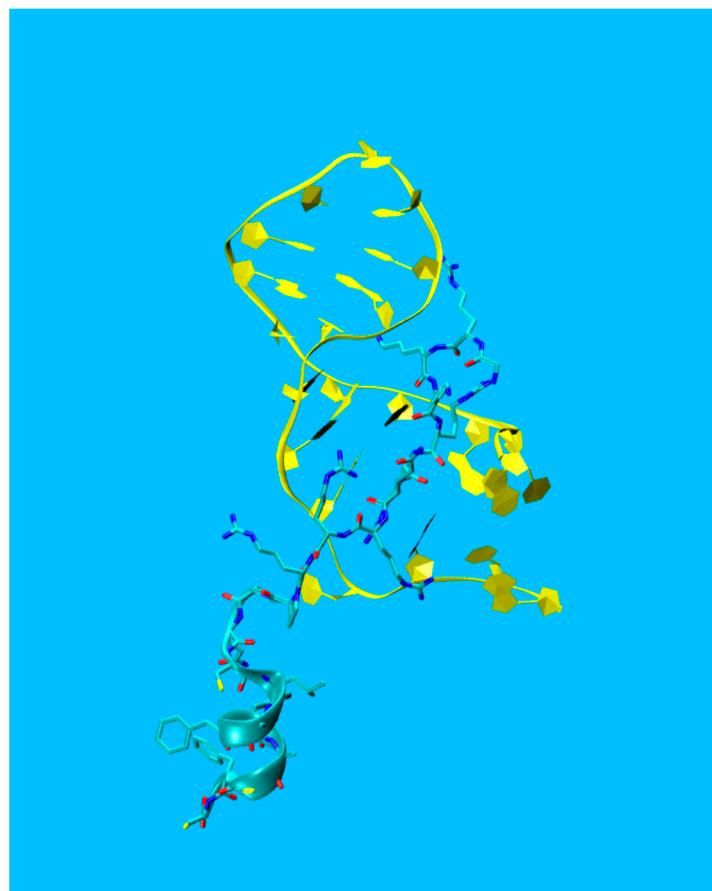

**Figure S2.** Structural sample, TAT-I24/ds(AT). The assembled complex was subjected to MM-PBSA analysis to estimate binding affinities (4, 5) of TAT-like peptides to DNA (TAT-I24 shown in cyan/blue/red, ds(AT) in yellow). DNA docosamers (6) are considered with sequences ds(AT):CATATATATCCCCATATATATG and ds(GC):CGCGCGCGCTTTGCGCGCGCG where the underlined stretch of nucleotides supposedly forms the hairpin loop region (yellow tip at the top). Two peptides are taken into account, GRKKRRQRRRPPQ (TAT (48-60)), and GRK-KRRQRRRPPQCLAFYACFC (TAT-I24) with I24 in likely helical conformation (as observed in long-term MD simulations; see lower left corner).

**Table S1.** Binding affinities of TAT or TAT-I24.

Binding affinities were determined from MM-PBSA analysis (4, 5) of always 250 ns of MD-simulation in explicit water (AMBER18, pmemd.cuda, NpT, 300 K, 1 bar,  $\Delta t = 1$  fs, protein.ff14SB, DNA.bsc1, water.tip3p, ionsjc tip3).  $\Delta G$  values given in parentheses include the approximation of entropic contributions.

| System          | MD time considered [ns] | $\Delta G_{GB}^{binding}$<br>[kcal/mol] | $\Delta G_{PB}^{binding}$<br>[kcal/mol] |
|-----------------|-------------------------|-----------------------------------------|-----------------------------------------|
| ds(AT)/TAT      | entire 250              | -116.9 (132.1)                          | -123.9 (125.2)                          |
|                 | final 200               | -118.4 (114.7)                          | -124.3 (108.8)                          |
|                 | final 150               | -121.2 (86.0)                           | -127.4 (79.8)                           |
|                 | final 100               | -119.4 (56.5)                           | <u>-127.6</u> (48.4)                    |
|                 | final 50                | -107.6 (18.3)                           | -118.2 (7.7)                            |
| ds(AT)/TAT -I24 | entire 250              | -124.6 (171.8)                          | -129.1 (167.3)                          |
|                 | final 200               | -124.3 (145.6)                          | -128.9 (141.0)                          |
|                 | final 150               | -126.5 (109.2)                          | -129.6 (106.1)                          |
|                 | final 100               | -133.0 (53.5)                           | <u>-133.3</u> (53.2)                    |
|                 | final 50                | -144.9 (-20.6)                          | -139.2 (-15.0)                          |
| ds(GC)/TAT      | entire 250              | -113.1 (112.1)                          | -120.4 (104.7)                          |
|                 | final 200               | -117.9 (92.5)                           | -124.3 (86.1)                           |
|                 | final 150               | -121.5 (70.5)                           | -127.4 (64.6)                           |
|                 | final 100               | -122.8 (41.7)                           | <u>-128.4</u> (36.2)                    |
|                 | final 50                | -125.8 (-8.1)                           | -131.0 (-13.2)                          |
| ds(GC)/TAT-I24  | entire 250              | -170.7 (114.0)                          | -164.3 (120.4)                          |
|                 | final 200               | -171.0 (88.4)                           | -164.6 (94.8)                           |
|                 | final 150               | -171.0 (58.1)                           | -164.7 (64.4)                           |
|                 | final 100               | -167.9 (20.0)                           | <u>-162.7</u> (25.1)                    |
|                 | final 50                | -165.0 (-41.2)                          | -159.8 (-36.0)                          |

- GB solvation models should be identical to PB with reliability (PB > GB)
- TAS terms show strong variation with increasing MD time hinting at substantial flexibility of the peptide
- $\Delta G$  results neglecting the entropy seem to converge rapidly
- The underlined result is a suggested compromise for direct qualitative/semi-quantitative comparison
- Ranking w.r.2 binding affinity, ds(GC)/TAT-I24 > ds(AT)/TAT-I24 > ds(GC)/TAT  $\approx$  ds(AT)/TAT
- For theoretical background of MM/PBSA analysis please see Kollman et al. (5)

# Video S1 (dna-tat-md-250ns.avi).

## Conformational dynamics of TAT-I24 DNA complexes.

This movie compares the conformational dynamics of all 4 complexes studied in aqueous solution as observed during 250 ns of MD simulation. The time course of the MD trajectories is represented as 360° views.

Figure S3

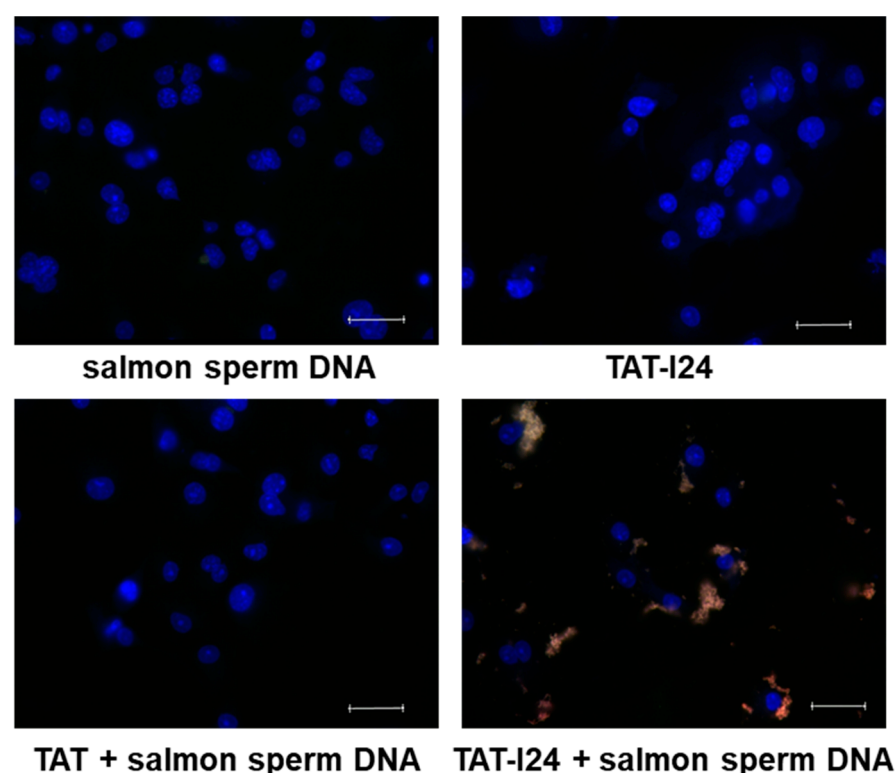

**Figure S3.** Fluorescence emission of a complex of TAT-I24 with DNA. COS-7 cells were incubated with 1 mg/ml salmon sperm DNA (a), 20  $\mu$ M TAT-I24 (b), 20  $\mu$ M TAT (48–60) and 1 mg/ml salmon sperm DNA (c) or 20  $\mu$ M TAT-I24 and 1 mg/ml salmon sperm DNA (d) for one hour before fixation and staining with DAPI. Images shown represent an overlay of the channels blue (DAPI), green and red (40x objective). Bars indicate 40  $\mu$ M.

## References

1. Tahirov, T.H.; Babayeva, N.D.; Varzavand, K.; Cooper, J.J.; Sedore, S.C.; Price, D.H. Crystal structure of HIV-1 Tat complexed with human P-TEFb. *Nat. Cell Biol.* **2010**, *465*, 747–751, doi:10.1038/nature09131.
2. Schulze-Gahmen, U.; Hurley, J.H. Structural mechanism for HIV-1 TAR loop recognition by Tat and the super elongation complex. *Proc. Natl. Acad. Sci.* **2018**, *115*, 12973–12978, doi:10.1073/pnas.1806438115.
3. Pham, V.V.; Salguero, C.; Khan, S.N.; Meagher, J.L.; Brown, W.C.; Humbert, N.; De Rocquigny, H.; Smith, J.L.; D’Souza, V.M. HIV-1 Tat interactions with cellular 7SK and viral TAR RNAs identifies dual structural mimicry. *Nat. Commun.* **2018**, *9*, 1–12, doi:10.1038/s41467-018-06591-6.
4. Sim, S.; Wang, P.; Beyer, B.N.; Cutrona, K.J.; Radhakrishnan, M.L.; Elmore, D.E. Investigating the nucleic acid interactions of histone-derived antimicrobial peptides. *FEBS Lett.* **2017**, *591*, 706–717, doi:10.1002/1873-3468.12574.
5. Kollman, P.A.; Massova, I.; Reyes, C.; Kuhn, B.; Huo, S.; Chong, L.; Lee, M.; Lee, T.; Duan, Y.; Wang, W., et al. Calculating Structures and Free Energies of Complex Molecules: Combining Molecular Mechanics and Continuum Models. *Acc. Chem. Res.*, **2000**, *33*, 889–897, doi.org/10.1021/ar000033j
6. Hsu, C.-H. Structural and DNA-binding studies on the bovine antimicrobial peptide, indolicidin: evidence for multiple conformations involved in binding to membranes and DNA. *Nucleic Acids Res.* **2005**, *33*, 4053–4064, doi:10.1093/nar/gki725.
